# Supplementary material for: Safe engineering of CAR T cells for adoptive cell therapy of cancer using long‐term episomal gene transfer
Source: PubMed Central journal article supplement (PMC4931286; doi:10.15252/emmm.201505869), 2016-05-06
Supplement: EMMM-8-702-s002.pdf [file EMMM-8-702-s002.pdf]

Source Data for Fig 1d

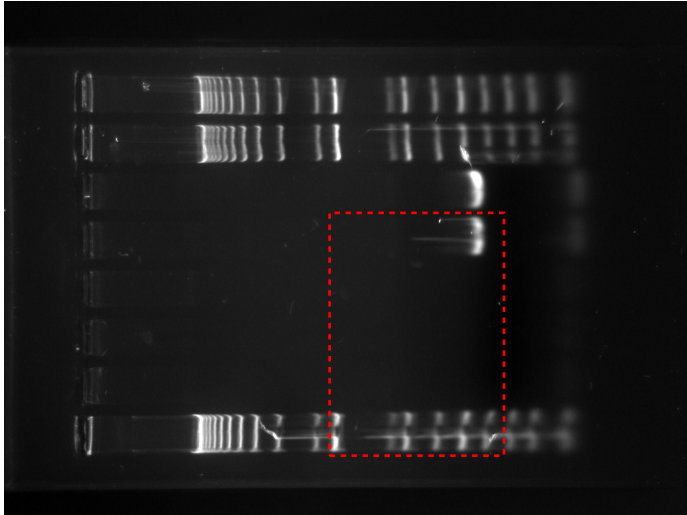

Cropped and used in Figure 1 d

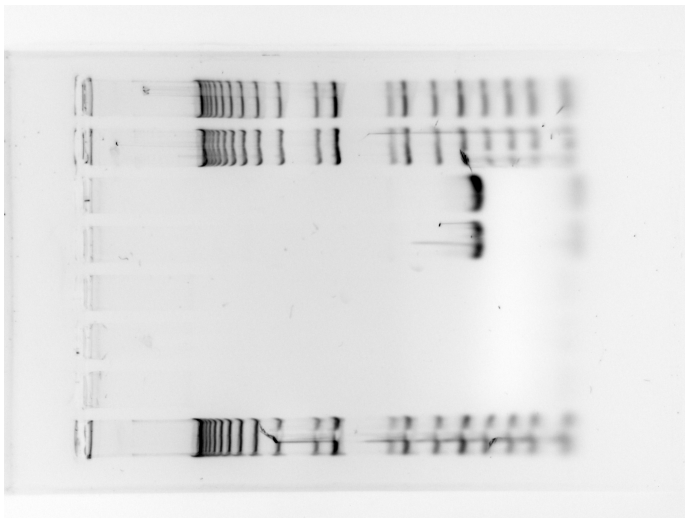

Alternative view (Inverted color)

Source Data for Fig 1e  
Southern Blot #1

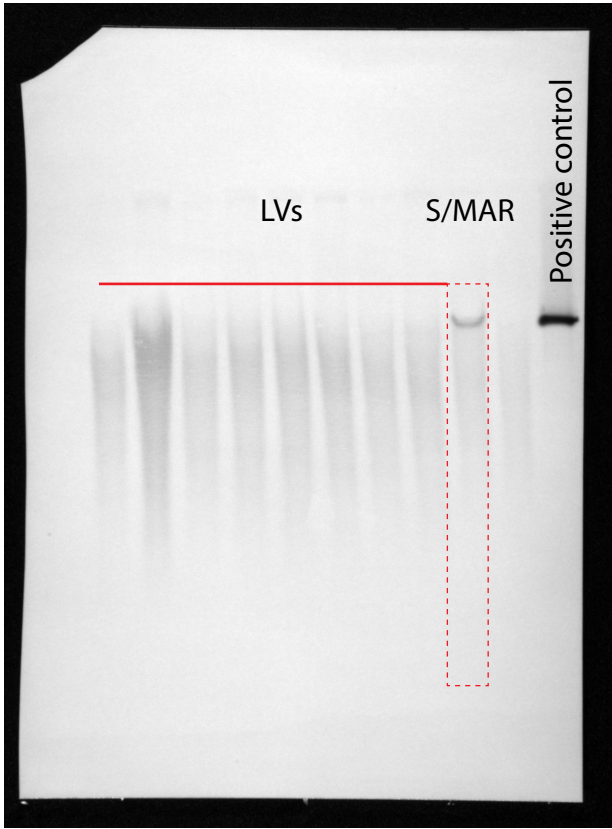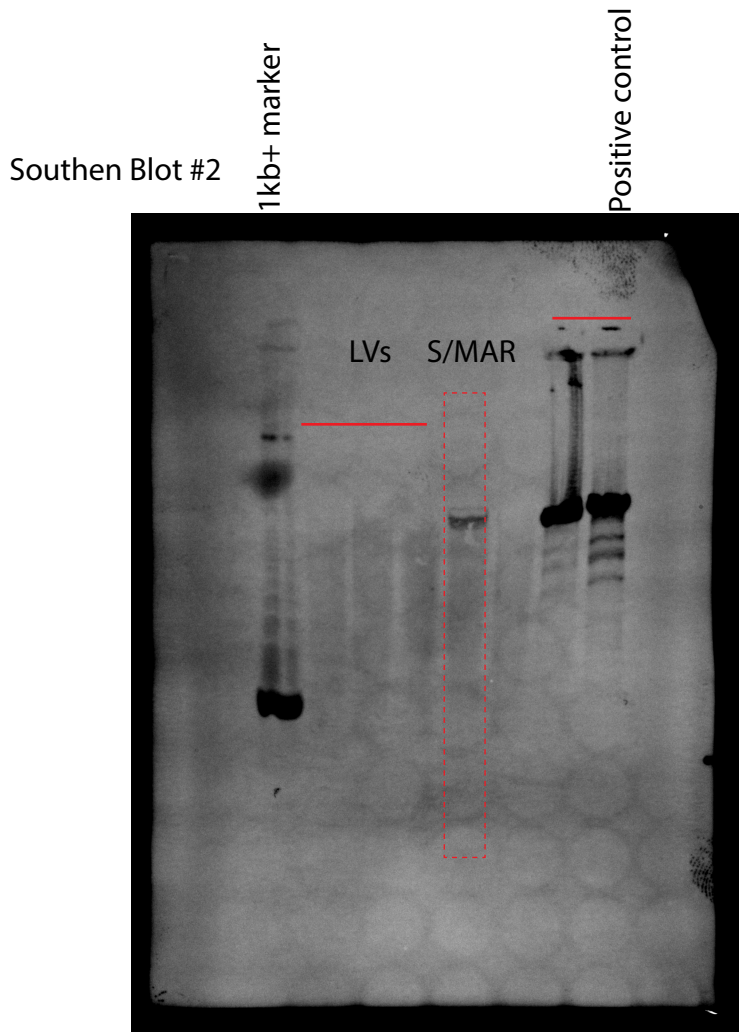

The 1650 band in 1kb+ size marker is visualized by probing the plasmid ori region (pUC)
